# Supplementary material for: The correlation between antioxidant, anti-inflammatory activity and the composition of free and bound phenolics in Chinese olive cultivars
Source: Research Square preprint supplement (doi:10.21203/rs.3.rs-3470017/v1), 2023-10-28
Supplement: Supplementary file 1 [file 37fad92c73afa3cdc0d02556.docx]

**Supplementary Information for:**

**The correlation between antioxidant, anti-inflammatory activity and the composition of free and bound phenolics in Chinese olive** **cultivars.**

Fangqing He1,2, Yixuan Du1,2, Zhuangguang Pan1,2, Huize Zeng1,2, Haolin Luo1,2, Junyi Wang1,2, Yuanming Sun1,2, Meiying Li1,2*

1 Guangdong Provincial Key Lab of Food Safety and Quality, South China Agricultural University, Guangzhou, Guangdong 510642, PR China

2 College of Food Science, South China Agricultural University, Guangzhou 510642, PR China

*** Corresponding author**

Meiying Li, Guangdong Provincial Key Lab of Food Safety and Quality, South China Agricultural University, China. Tel: +86 20 85283448 Fax: +86 20 85280270, E-mail: [lmy1982@scau.edu.cn](mailto:lmy1982@scau.edu.cn)

**Materials and methods**

**Chemical reagents**

The standard reference materials were purchased from Yuanye Scientific Co. (Shanghai, ON, China). Analytical-grade materials were purchased from Kermel Scientific Co. (Tianjin, ON, China). The 2,2-Diphenyl-1-picrylhydrazyl (DPPH), 2,2’-Azinobis-(3-ethylbenzothiazoline-6-sulfonic acid) (ABTS),2,2’-azobis (2-amidinopropane) dihydrochloride (AAPH), and 5,7,8-tetramethylchroman-2-carboxylic acid (Trolox) were purchased from Sigma Aldrich (Shanghai, China). Macrophage RAW264.7 cells stored in liquid nitrogen were purchased from Jinan University (Guangzhou, China). Dulbecco Modified Eagle Medium (DMEM) (Procell Life Science&Technology Co.,Ltd.,Wuhan, China). Penicillin-streptomycin and fetal bovine serum (FBS) (Grand Island, NY, USA). Cell Counting Kit-8 (CCK-8) (Yeasen Biotechnology (Shanghai) Co., Ltd.). The Nitric oxide (NO) kit was purchased from Beyotime Biotechnology (Shanghai, China). The mouse TNF-α ELISA kit and mouse IL-6 ELISA kit were purchased from NeoBioscience Technology (Shenzhen, China).

**Sample preparation and extraction of free and bound phenolics**

Mature Chinese olive fruits were obtained from the Chaoshan region of Guangdong Province in southern China, including three different varieties: ‘Na zhong’, ‘Tan xiang’, and ‘Xiang zhong’. All fruits were washed, cored, sliced and stored at -80℃ for 12 h. Dried by vacuum lyophilizer (Christ, Osterode am Harz, Germany) before making powder and then kept at -20℃ before analysis.

The extract method references Li et al[[1](#_ENREF_1)]. For free phenolics, each sample was taken 3g and removed lipids by 30mL hexyl hydride three times. Then extracted with 90mL methanol (1%HCl 80:20 v/v) was ultrasonicated for 30 min and centrifuged (8,000 rpm,15 min, 4℃) to collect the supernatant (two times). For bound phenolics, 90mL 3M NaOH (10mM EDTA, 1%Vc) extracted the residues for 4 h in continuous oscillation. Subsequently, the mixtures were added 6M HCl adjusted to pH 2 and centrifuged (8,000 rpm,15 min, 4℃) to collect the supernatant. Similarly, 90mL 3M HCl extracted the residues from the previous step for 1h at 85℃ then added 6M NaOH adjusted to pH 2. Centrifuged (8,000 rpm,15 min, 4℃) to collect the supernatant and added ethyl acetate to the combined organic phase. After this triple hydrolysis, nitrogen was bubbled and the bottle was sealed during ultrasonicated and oscillated. The free and bound phenolic supernatants were evaporated respectively using a rotary vacuum evaporator (BUCHI, China) and resolubilized separately with methanol. The samples were freeze-dried and solved in methanol or DMSO (dimethyl sulphoxide) before the experiment.

**Analyses of Total Phenolics Contents and Total Flavonoid Content**

The quantification of total phenolics contents (TPC) was conducted using the method proposed by You [[2](#_ENREF_2)] Briefly, 20 μL of sample extracts were mixed with 100 μL Folin-Ciocalteu reagent (0.2N) in 96-well plates. After 10 min, 100 μL of 10 % Na2CO3 was added for 30 min at room temperature. Finally, the absorbance was measured at 765 nm on a microplate reader (Molecular Devices, United States). The TPC was expressed as milligrams of gallic acid equivalents per gram of dried weight (mg GAE/g DW) of Chinese olive (ABS-concentration curve: y = 0.0058x + 0.0164 R² = 0.9991).

The quantification of total flavonoid content (TFC) was conducted using the method proposed by Yang [[3](#_ENREF_3)]. 25 μL of sample extracts were subjected to 110 μL NaNO2(0.66M) in 96-well plates. After 5 min, 10 μL of AlCl3 (0.75M) was added and allowed to stand for 6 min before the addition of 100 μL of NaOH (0.5M). Finally, the absorbance was measured at 510 nm on a microplate reader. The TFC was expressed as milligrams of rutin equivalents per gram of dried weight (mg RE/g DW) of Chinese olive (ABS-concentration curve: y = 0.0005x - 0.0037 R² = 0.9997).

**Nano-Quadrupole-Exactive Orbitrap Mass Spectroscopy (UPLC- MS)**

Separation of phenolic compounds was performed on an ACQUITY UPLC BEH C18 column (2.1 mm × 100 mm, 1.7 µm; Waters, USA) eluting with solvent A (acetonitrile) and solvent B (water with 0.1% formic acid) by UltiMate 3000 liquid chromatographic system (Thermofisher Scientific, China). The identification and quantification of extracts were carried out in a Q–Exactive Orbitrap MS (Thermofisher Scientific, China) equipped with an electrospray ionization (ESI) source. The gradient method is according to the methodology proposed by Yang [[3](#_ENREF_3)]. MS experiments in positive and negative scan ionization mode interface (auxiliary gas (N2), 10 arb; sheath gas (N2), 35 arb; capillary voltage, 3,200 V; capillary temperature, 320℃; scan range, 70–1,500 m/z. Before the analysis, an external calibration was performed to determine the accuracy of the masses measured. Data analysis was performed using Trace Finder software (Thermofisher Scientific, version 4.0), and the identification of the compounds was made by comparing the exact masses, MS/MS mass spectra and molecular formulas to the database available in the literature.

**Analyses of antioxidant capacity assay**

Antioxidant capacity assay of Phenolic compounds using the radical scavenging activity of DPPH, ABTSand ORAC (Oxygen Radical Absorbance Capacity) methods. The detection method of DPPH scavenging activity using a modified procedure[[4](#_ENREF_4)], 100µL 0.5mM DPPH and 100µL sample were mixed for 30 min in dark conditions. The microplate reader (Molecular Devices, United States) was used in multimode spectrophotometric detection at 517 nm with 96-well plates.

The ABTS [[5](#_ENREF_5)]was formed after the addition of 2.45mM potassium persulfate to the 7mM ABTS at room temperature (23℃) in the dark for 16 hours. The ABTS solution was diluted with 80% ethanol to an absorbance of 0.700 ± 0.050 at 734 nm. Then, 200μL ABTS working solution and 20μL sample were mixed for 10 min at 734nm by a microplate reader.

To ORAC[[6](#_ENREF_6)], fluorescein sodium (95.6nM) was dissolved in PBS（phosphate buffer saline） buffer solution(pH=7) and AAPH (150mM) was dissolved in waters. The fluorescein sodium solution was diluted with a buffer solution. A total of 100 µL fluorescein sodium solution and 25 µL sample were mixed in a black 96-well plate at 37℃ for 15 min. Subsequently, 75 µL AAPH was added and recording of fluorescence intensity was started by scheduled recording function of a fluorometer with excitation at 485 nm and emission at 530nm every 2 min for 2 h.

All results were expressed as mg Trolox equivalents per gram of dry weight (mg TE/g DW) (ABS-concentration curve of DPPH: y = 0.6367x + 1.1433 R² = 0.9994) (ABS-concentration curve of ABTS: y = 0.2068x - 0.384 R² = 0.9991) (ABS-concentration curve of ORAC: y = 285588x + 25893 R² = 0.9997).

**Anti-Inflammatory activity assay**

Cell culture

RAW264.7 cell growth was carried out in DEME cell medium with 10%(v/v) FBS and 1%(v/v) penicillin-streptomycin. Incubation in a humidified atmosphere (37 °C, 5% CO2). The cells were subcultured when they grew to 80 % density.

Cell viability analysis

Cells were sub-cultured to a concentration suitable (3.0 × 104 cells/mL,100µL,96-well plates) and incubated for 24h for cellular viability using the CCK-8 assay. Then, culture medium containing extraction (0, 25, 50, 100 and 200 μg/mL) was added and incubated for 24 h. The polyphenols were dissolved in not exceeding 0.1% DMSO and diluted appropriately just before cell treatments. Culture media were removed and 100μL DEME and 10µL of CCK-8 solution were added per well to incubate for 2h. Finally, absorbance readings were performed at 450nm using a microplate reader.

Detection of inflammatory mediators

The LPS was used in a RAW264.7 cell as a model for inflammatory disease. Cells were cultured in 24-well plates at 37°C (1.0 × 105 cells/mL,500μL). After 24 hours, the culture media was discarded phenolic extraction (suitable concentrations were found from CCK-8 assay) and LPS (1μg/mL) (3 biological replicates per concentration). Another 24h incubation, the supernatant was used for NO, TNF-α, and IL-6 assay according to the manufacturer's protocol.

**Multivariate data analysis**

Partial least squares discriminant analysis (PLS-DA) was applied to establish the classification model among three cultivars. The relationships among bioactivity and phenolic compounds were visualized using a correlation heatmap with sign. The clusters Multivariate data statistics were carried out using the OmicStudio tools at https://www.omicstudio.cn/tool.

**Statistical analysis**

Data were presented as the means ± standard deviation for each experimental group. Statistical analysis was performed by one-way analysis of variance using GraphPad program 8.0; *p* < 0.05 was considered as statistically significant.

**References**

1. Li W, Yang RL, Ying DY et al(2020) Analysis of polyphenols in apple pomace: A comparative study of different extraction and hydrolysis procedures. Industrial Crops and Products, 147.https://doi.org/10.1016/j.indcrop.2020.112250

2. You B, Yang S, Yu J et al(2021) Effect of thermal and dry salt-curing processing on free and bound phenolics and antioxidant activity in Prunus mume fruits together with the phenolic bioaccessibility. Lwt-Food Science and Technology, 145.https://doi.org/10.1016/j.lwt.2021.111355

3. Yang Y, Li W, Xian W et al(2022) Free and Bound Phenolic Profiles of Rosa roxburghii Tratt Leaves and Their Antioxidant and Inhibitory Effects on alpha-Glucosidase. Frontiers in Nutrition, 9.https://doi.org/10.3389/fnut.2022.922496

4. Cheng ZH, Moore J, Yu LL(2006) High-throughput relative DPPH radical scavenging capacity assay. Journal of Agricultural and Food Chemistry, 54**:**7429-7436.https://doi.org/10.1021/jf0611668

5. Yu J, Li W, You B et al(2021) Phenolic profiles, bioaccessibility and antioxidant activity of plum (Prunus Salicina Lindl). Food Research International, 143.https://doi.org/10.1016/j.foodres.2021.110300

6. White BL, Howard LR, Prior RL(2010) Polyphenolic Composition and Antioxidant Capacity of Extruded Cranberry Pomace. Journal of Agricultural and Food Chemistry, 58**:**4037-4042.https://doi.org/10.1021/jf902838b

**Table 1of Supplementary material** Tentative identification of phenolic compounds(PC) about the free phenolic(FP) and bound phenolic(BP) in *Canarium album* L.

| **ID** | **Tentative compound** | **RT**  **(min)** | **Molecular Formula** | **Ion peak**  **(*m*/*z*)** | **Fragment** | **Species** | | | | | |
| --- | --- | --- | --- | --- | --- | --- | --- | --- | --- | --- | --- |
| ***Canarium album* L.**  **‘Na zhong’** | | ***Canarium album* L.**  **‘Tan xiang’** | | ***Canarium album* L.**  **‘Xiang zhong’** | |
| **FP** | **BP** | **FP** | **BP** | **FP** | **BP** |
| **Hydroxybenzoic acids and derivatives** | | | | | | | | | | | |
| 1 | Quinic acid | 1.67 | C7H12O6 | 191.05441 | 127.03812 | + | + | + | + | + | + |
| 2 | Galloylquinic acid | 2.66 | C14H16O10 | 343.06656 | 191.05504,  169.01312 | + | + | + | + | + | + |
| 3 | Gallic acid hexoside | 2.7 | C13H16O10 | 331.06583 | 169.01259,  124.01524 | + | + | + | + | + | + |
| 4 | Gallic acid | 3.91 | C7H6O5 | 169.01254 | 125.02260 | + | + | + | + | + | + |
| 5 | Vanillic acid hexoside | 4.01 | C14H18O9 | 329.08701 | 167.03391,  152.01031 | + | - | + | - | + | - |
| 6 | Protocatechuic acid | 5.76 | C7H6O4 | 153.01767 | 109.02767 | + | + | + | + | + | + |
| 7 | Brevifolincarboxylic acid | 6.31 | C13H8O8 | 291.01473 | 247.02423 | + | + | + | + | + | + |
| 8 | 4-hydroxybenzoic acid | 6.41 | C7H6O3 | 137.02258 | 93.03278 | + | + | + | + | + | + |
| 9 | Syringic acid | 7.21 | C9H10O5 | 197.04469 | 153.05446 | + | + | + | + | + | + |
| **Hydroxycinnamic acids and derivatives** | | | | | | | | | | | |
| 10 | Chlorogenic acid | 6.06 | C16H18O9 | 353.08887 | 191.05545 | + | - | + | - | + | - |
| 11 | Caffeic acid | 6.81 | C9H8O4 | 179.0335 | 161.04378,  143.98611 | - | + | - | + | - | + |
| 12 | Esculetin | 7.05 | C9H6O4 | 177.01831 | 177.01831,  148.96439 | - | + | - | + | - | - |
| 13 | 4-hydroxycinnamic acid | 8.78 | C9H8O3 | 163.03926 | 119.04892 | + | + | + | + | + | + |
| 14 | Ferulic acid | 10.63 | C10H10O4 | 193.04863 | 178.02556,  158.84500 | - | + | - | + | - | + |
| 15 | Isoferulic acid | 11.29 | C10H10O4 | 193.81387 | 178.02557,  149.05905 | + | + | + | + | + | + |
| 16 | Cinnamic acid | 15.60 | C9H8O2 | [M+H]  149.05971 | 131.92918,  103.05419 | + | + | + | + | + | - |
| **Isoflavones and derivatives** | | | | | | | | | | | |
| 17 | Genistin | 10.16 | C21H20O10 | 431.09824 | 269.04559 | + | + | + | + | + | - |
| 18 | Genistein | 16.02 | C15H10O5 | 269.04559 | 197.05989  133.02831 | - | + | - | + | - | + |
| **Flavones and derivatives** | | | | | | | | | | | |
| 19 | Hyperoside | 9.12 | C21H20O12 | 463.08673 | 300.02603,  271.02298 | + | + | + | + | + | + |
| 20 | Astragalin | 10.12 | C21H20O11 | 447.09192 | 284.03146,  255.02794 | + | - | + | - | + | - |
| 21 | Nobiletin | 16.85 | C21H22O8 | 401.08731 | 313.07007,  225.05339 | + | + | + | + | + | + |
| 22 | Amentoflavone | 17.06 | C30H18O10 | 537.08264 | 375.05087,  401.02982 | - | + | - | + | - | + |
| **Flavonols and derivatives** | | | | | | | | | | | |
| 23 | Isoquercitrin | 9.27 | C21H20O12 | 463.10280 | 300.02734,  271.02530 | + | - | + | - | + | - |
| 24 | Kaempferol 3-O-glucoside | 10.00 | C21H20O11 | 447.09341 | 285.03931,  284.03247 | + | - | + | - | + | - |
| 25 | Quercetin | 14.56 | C15H10O7 | 301.03381 | 273.93973,  178.99767 | + | + | + | + | + | + |
| 26 | Dihydrokaempferol | 15.73 | C15H12O6 | 287.22159 | 269.04532,  243.06570 | - | + | - | + | - | - |
| 27 | Kaempferol | 16.22 | C15H10O6 | 285.04047 | 257.04620,  151.00218 | - | - | + | - | - | - |
| **Flavanols and derivatives** | | | | | | | | | | | |
| 28 | Gallocatechin | 4.30 | C15H14O7 | 305.06528 | 167.03325 | + | - | + | - | + | - |
| 29 | Procyanidin B1 | 5.44 | C30H26O12 | 577.13477 | 407.07788,  289.07257 | + | - | + | - | + | - |
| 30 | Epigallocatechin | 5.55 | C15H14O7 | 305.06528 | 179.03383,  125.02285 | + | - | + | - | + | - |
| 31 | Catechin | 5.88 | C15H14O6 | 289.07062 | 245.08060,  179.03340 | + | + | + | + | + | + |
| 32 | Procyanidin B2 | 6.57 | C30H26O12 | 577.13605 | 407.07721,  289.07196 | + | - | + | - | + | - |
| 33 | Epicatechin | 6.95 | C15H14O6 | 289.07050 | 245.08046 | + | - | + | - | + | - |
| **Other** **polyphenols and derivatives** | | | | | | | | | | | |
| 34 | Geraniin isomers | 6.71 | C41H28O27 | 951.07397 | 765.05890,  300.99860 | + | + | + | + | + | + |
| 35 | Corilagin (1-O-galloyl-3,6-(R)-HHDP-β-d-glucose) | 6.79 | C9H10O4 | 633.07343 | 300.99860  275.01981 | + | + | + | + | + | + |
| 36 | Galloyl-bis-HHDP-glucose | 6.86 | C41H28O26 | 935.07928 | 633.07623,  463.05222,  300.99893 | + | - | + | - | + | - |
| 37 | Paeonol | 7.28 | C9H10O3 | [M+H]  167.10587 | 149.09552,  121.10091 | + | + | + | + | + | + |
| 38 | Geraniin | 7.78 | C41H28O27 | 951.07397 | 765.05890,  300.99860 | + | + | + | + | + | + |
| 39 | Ellagic acid pentoside | 7.85 | C19H14O12 | 433.04089 | 300.99850 | + | + | + | + | + | + |
| 40 | Ellagic acid glucuronoside | 8.37 | C20H14O14 | 477.10364 | 433.11401,  315.01450,  300.99847 | + | - | + | - | + | - |
| 41 | Methyl-ellagic acid glucuronoside | 8.67 | C21H16O14 | 491.04654 | 315.01434,  300.99850 | + | - | + | - | + | - |
| 42 | Ellagic acid | 8.84 | C14H6O8 | 300.99756 | 257.00873 | + | + | + | + | + | + |
| 43 | Methyl ellagic acid pentoside | 9.83 | C20H16O12 | 447.05676 | 315.01450,  300.99802 | + | + | + | + | + | + |
| 44 | Syringaldehyde | 10.75 | C9H10O4 | 181.97128 | 136.90796 | + | + | + | + | + | + |

**Table 2 of Supplementary material** Quantification of phenolic compounds (PC) about the free phenolic (FP) in *Canarium album* L.

| **ID** | **Tentative compound** | **RT**  **(min)** | **Molecular Formula** | **Species (mg/100gDW)** | | |
| --- | --- | --- | --- | --- | --- | --- |
| ***Canarium album* L.**  **‘Na zhong’** | ***Canarium album* L.**  **‘Tan xiang’** | ***Canarium album* L.**  **‘Xiang zhong’** |
| **Hydroxybenzoic acids and derivatives** | | | | | | |
| 1 | Quinic acid | 1.67 | C7H12O6 | 1229.69±97.92 a | 1278.65±133.28 a | 1381.07±211.15 a |
| 2 | Galloylquinic acid* | 2.66 | C14H16O10 | 296.50±62.78 a | 198.06±19.56 a | 283.51±72.44 a |
| 3 | Gallic acid hexoside* | 2.7 | C13H16O10 | 15.04±1.47 b | 29.14±6.01a | 22.67±2.71ab |
| 4 | Gallic acid | 3.91 | C7H6O5 | 9.62±1.56 a | 13.13±3.97a | 13.41±2.52a |
| 5 | Vanillic acid hexoside* | 4.01 | C14H18O9 | 8.18±1.20 b | 13.24±0.82 a | 10.70±2.83 ab |
| 6 | Protocatechuic acid | 5.76 | C7H6O4 | 0.29±0.12 b | 0.58±0.08 a | 0.41±0.11 ab |
| 7 | Brevifolincarboxylic acid* | 6.31 | C13H8O8 | 44.91±12.93 b | 82.21±8.01 a | 38.31±3.70 b |
| 8 | 4-hydroxybenzoic acid | 6.41 | C7H6O3 | 0.51±0.04 b | 1.27±0.17 a | 0.65±0.09 b |
| 9 | Syringic acid | 7.21 | C9H10O5 | 0.23±0.08 a | 0.33±0.04 a | 0.27±0.05 a |
| **Total (mg/100gDW)** | | | | 1604.98±134.09 a (77.11%) | 1616.62±170.19 a (64.76%) | 1750.99±229.33 a (78.59%) |
| **Hydroxycinnamic acids and derivatives** | | | | | | |
| 10 | Chlorogenic acid | 6.06 | C16H18O9 | 0.23±0.01 c | 0.92±0.07 a | 0.64±0.09 b |
| 11 | 4-hydroxycinnamic acid | 8.78 | C9H8O3 | 0.01±0.01 b | 0.05±0.02 a | ND |
| 12 | Isoferulic acid | 10.21 | C10H10O4 | 0.23±0.06 b | 0.58±0.15 a | 0.24±0.05 b |
| 13 | Cinnamic acid | 15.60 | C9H8O2 | 0.81±0.27 b | 2.85±0.68 a | 1.36±0.21 b |
| **Total (mg/100gDW)** | | | | 1.28±0.34 b (0.06%) | 4.40±0.85 a (0.18%) | 2.25±0.25 b (0.10%) |
| **Isoflavones and derivatives** | | | | | | |
| 14 | Genistin | 10.16 | C21H20O10 | 0.03±0.01 a | 0.04±0.01 a | ND |
| **Total (mg/100gDW)** | | | | 0.03±0.01 a (0%) | 0.04±0.01 a (0%) | 0% |
| **Flavones and derivatives** | | | | | | |
| 15 | Hyperoside | 9.12 | C21H20O12 | 45.52±5.29 b | 102.59±16.91 a | 47.00±4.29 b |
| 16 | Astragalin | 10.12 | C21H20O11 | 8.72±3.22 b | 27.67±2.67 a | 7.96±1.72 b |
| 17 | Nobiletin* | 16.85 | C21H22O8 | 0.05±0.02 b | 0.40±0.06 a | 0.23±0.17 ab |
| **Total (mg/100gDW)** | | | | 54.30±8.18 b (2.61%) | 130.66±18.73 a (5.23%) | 55.19±5.96 b(2.48%) |
| **Flavonols and derivatives** | | | | | | |
| 18 | Isoquercitrin | 9.27 | C21H20O12 | 35.57±4.35 b | 82.52±13.92 a | 36.70±3.54 b |
| 19 | Kaempferol 3-O-glucoside* | 10.00 | C21H20O11 | 14.26±5.20 b | 44.80±4.35 a | 13.02±2.75 b |
| 20 | Quercetin | 14.56 | C15H10O7 | ND | 2.28±0.67 a | ND |
| 21 | Kaempferol | 16.32 | C15H10O6 | ND | 0.39±0.15 a | ND |
| **Total (mg/100gDW)** | | | | 49.83±9.13 b (2.39%) | 129.99±17.81 a (5.21%) | 49.72±6.01 b (2.23%) |
| **Flavanols and derivatives** | | | | | | |
| 22 | Gallocatechin | 4.30 | C15H14O7 | 0.53±0.13 b | 1.00±0.02 a | 0.54±0.09 b |
| 23 | Procyanidin B1 | 5.44 | C30H26O12 | 0.82±0.05 b | 1.54±0.40 a | 1.03±0.23 ab |
| 24 | Epigallocatechin* | 5.55 | C15H14O7 | 0.13±0.01 a | 0.12±0.01 a | 0.03±0.01 b |
| 25 | Catechin | 5.88 | C15H14O6 | 2.45±0.98 a | 3.90±0.19 a | 3.41±1.04 a |
| 26 | Procyanidin B2 | 6.57 | C30H26O12 | 0.78±0.05 b | 1.40±0.14 a | 0.22±0.02 c |
| 27 | Epicatechin | 6.95 | C15H14O6 | 0.85±0.20 b | 1.49±0.16 a | 0.17±0.07 c |
| **Total (mg/100gDW)** | | | | 5.61±1.44 b (0.27%) | 9.44±0.79 a (0.38%) | 5.43±1.41 b (0.24%) |
| **Other Polyphenols** | | | | | | |
| 28 | Geraniin isomers* | 6.71 | C41H28O27 | 30.76±1.40 b | 106.45±6.11 a | 39.80±4.96 b |
| 29 | Corilagin (1-O-galloyl-3,6-(R)-HHDP-β-d-glucose) | 6.79 | C9H10O4 | 203.00±6.14 b | 271.02±45.81 a | 179.86±4.70 b |
| 30 | Galloyl-bis-HHDP-glucose* | 6.86 | C41H28O26 | 3.85±0.36 b | 3.64±0.19 b | 8.08±1.02 a |
| 31 | Paeonol | 7.28 | C9H10O3 | 0.05±0.04 a | 0.41±0.20 a | 0.36±0.15 a |
| 32 | Geraniin* | 7.78 | C41H28O27 | 23.69±0.99 b | 33.86±2.20 a | 25.47±9.11 ab |
| 33 | Ellagic acid pentoside* | 7.85 | C19H14O12 | 47.09±3.61 b | 114.63±10.47 a | 48.26±3.85 b |
| 34 | Ellagic acid glucuronoside* | 8.37 | C20H14O14 | 15.74±0.30 a | ND | 15.41±0.06 a |
| 35 | Methyl-ellagic acid glucuronoside* | 8.67 | C21H16O14 | 5.37±3.01 a | 6.32±0.87 a | 4.65±1.21 a |
| 36 | Ellagic acid | 8.84 | C14H6O8 | 27.30±2.23 b | 66.12±15.05 a | 40.30±2.90 b |
| 37 | Methyl ellagic acid pentoside* | 9.83 | C20H16O12 | 8.11±3.50 a | 2.52±0.38 b | 1.71±0.10 b |
| 38 | Syringaldehyde | 10.75 | C9H10O4 | 0.38±0.04 a | 0.36±0.02 a | 0.41±0.05 a |
| **Total (mg/100gDW)** | | | | 365.33±18.99 b (17.55%) | 605.33±80.58 a (24.25%) | 364.31±8.44 b (16.35%) |
| **Total PC (mg/100gDW)** | | | | 2081.36±131.54 a | 2496.48±285.13 a | 2227.89±226.04 a |

Values represent the mean ± standard error (n = 3). The different lowercase letters between each row indicate significant differences (p < 0.05) between the Chinese olive species. Quantification was reported in mg/100 g DW. ND = not detected. * Galloylquinic acid, gallic acid hexoside and brevifolincarboxylic acid were quantified in gallic acid equivalents. Vanillic acid hexoside was quantified in vanillic acid equivalents. Nobiletin was quantified in hyperoside equivalents. Kaempferol 3-O-glucoside was quantified in kaempferol equivalents. Epigallocatechin was quantified in gallocatechin equivalents. Geraniin isomers, galloyl-bis-HHDP-glucose, geraniin, ellagic acid pentoside, ellagic acid glucuronoside, methyl-ellagic acid glucuronoside, and methyl ellagic acid pentoside were quantified in ellagic acid equivalents.

**Table 3 of Supplementary material** Quantification of phenolic compounds (PC) about the bound phenolic(BP) in *Canarium album* L.

| **ID** | **Tentative compound** | **RT**  **(min)** | **Molecular Formula** | **Species (mg/100gDW)** | | |
| --- | --- | --- | --- | --- | --- | --- |
| ***Canarium album* L.**  **‘Na zhong’** | ***Canarium album* L.**  **‘Tan xiang’** | ***Canarium album* L.**  **‘Xiang zhong’** |
| **Hydroxybenzoic acids and derivatives** | | | | | | |
| 1 | Quinic acid | 1.67 | C7H12O6 | 3.67±0.44 b | 23.49±5.40 a | 1.44±0.32 b |
| 2 | Galloylquinic acid* | 2.66 | C14H16O10 | 0.79±0.07 a | 0.92±0.55a | 0.15±0.01a |
| 3 | Gallic acid hexoside* | 2.7 | C13H16O10 | 0.02 a | 0.03±0.01 a | 0.01 a |
| 4 | Gallic acid | 3.91 | C7H6O5 | 8.56±1.04 a | 10.47±0.87 a | 13.24±4.12 a |
| 5 | Protocatechuic acid | 5.76 | C7H6O4 | 0.24±0.13 a | 0.17±0.04 a | 0.20±0.04 a |
| 6 | Brevifolincarboxylic acid* | 6.31 | C13H8O8 | 0.36±0.06 a | 0.68±0.34 a | 0.29±0.02 a |
| 7 | 4-hydroxybenzoic acid | 6.41 | C7H6O3 | 1.60±0.43 a | 1.26±0.17 a | 1.20±0.21 a |
| 8 | Syringic acid | 7.21 | C9H10O5 | 0.99±0.02 a | 0.93±0.06 a | 0.95±0.03 a |
| **Total (mg/100gDW)** | | | | 16.23±1.22 b (34.18%) | 37.96±4.71 a (67.49%) | 17.48±4.60 b (56.82%) |
| **Hydroxycinnamic acids and derivatives** | | | | | | |
| 9 | Caffeic acid | 6.81 | C9H8O4 | 0.19±0.09 a | 0.12±0.02 a | 0.13±0.04 a |
| 10 | Esculetin | 7.05 | C9H6O4 | 0.02 a | ND | ND |
| 11 | 4-hydroxycinnamic acid | 8.78 | C9H8O3 | 0.14±0.02 ab | 0.16±0.01 a | 0.08±0.04 b |
| 12 | Ferulic acid | 9.53 | C10H10O4 | 0.39±0.33 a | 0.16±0.04 a | 0.11±0.04 a |
| 13 | Isoferulic acid | 10.21 | C10H10O4 | 5.03±1.38 a | 0.87±0.19 b | 0.75±0.16 b |
| 14 | Cinnamic acid | 15.60 | C9H8O2 | 1.42±0.08 a | 0.60±0.34 ab | 0.86±0.04 b |
| **Total (mg/100gDW)** | | | | 7.14±1.22 a (15.04%) | 1.91±0.55 b (3.40%) | 1.94±0.18 b (6.30%) |
| **Isoflavones and derivatives** | | | | | | |
| 15 | Genistin | 10.16 | C21H20O10 | 0.38±0.12 a | 0.17±0.08 a | 0.19±0.05 a |
| 16 | Genistein | 16.02 | C15H10O5 | 0.85±0.07 a | 0.31±0.10 b | 0.44±0.13 b |
| **Total (mg/100gDW)** | | | | 1.23±0.12 a (2.59%) | 0.48±0.16 b (0.86%) | 0.63±0.17 b (2.04%) |
| **Flavones and derivatives** | | | | | | |
| 17 | Hyperoside | 9.19 | C21H20O12 | 1.10±1.44 a | 0.08±0.06 a | 0.02±0.01 a |
| 18 | Nobiletin* | 16.85 | C21H22O8 | 0.72±0.05 a | 0.30±0.07 b | 0.30±0.06 b |
| 19 | Amentoflavone* | 17.06 | C30H18O10 | 0.61±0.90 a | 1.30±0.32 a | 1.14±0.39 a |
| **Total (mg/100gDW)** | | | | 2.43±1.17 a (5.12%) | 1.68±0.32 a (2.99%) | 1.46±0.45 a (4.74%) |
| **Flavonols and derivatives** | | | | | | |
| 20 | Quercetin | 14.56 | C15H10O7 | 0.45±0.18 b | 2.48±0.34 a | 2.08±0.79 a |
| 21 | Dihydrokaempferol* | 15.73 | C15H12O6 | 0.03 a | 0.01 b | ND |
| **Total (mg/100gDW)** | | | | 0.48±0.19 b (1.02%) | 2.49±0.34 a (4.43%) | 2.08±0.79 a (6.77%) |
| **Flavanols and derivatives** | | | | | | |
| 22 | Catechin | 5.88 | C15H14O6 | 0.03±0.01 b | 0.14±0.01 b | 0.29±0.09 a |
| **Total (mg/100gDW)** | | | | 0.03±0.01 b (0.05%) | 0.14±0.01 b (0.24%) | 0.29±0.09 a (0.95%) |
| **Other polyphenols and derivatives** | | | | | | |
| 23 | Geraniin isomers* | 6.71 | C41H28O27 | 0.53±0.39 a | 0.24±0.11 a | 0.15±0.05 a |
| 24 | Corilagin (1-O-galloyl-3,6-(R)-HHDP-β-d-glucose) | 6.79 | C9H10O4 | 0.80±0.19 a | 0.74±0.11 a | 0.63±0.03 a |
| 25 | Paeonol | 7.28 | C9H10O3 | 0.49±0.21 a | 0.32±0.15 a | 0.57±0.25 a |
| 26 | Geraniin* | 7.78 | C41H28O27 | 0.16±0.07 a | 0.12±0.03 a | 0.10±0.02 a |
| 27 | Ellagic acid pentoside* | 7.85 | C19H14O12 | 1.04±0.67 a | 0.69±0.56 a | 0.37±0.24 a |
| 28 | Ellagic acid | 8.84 | C14H6O8 | 9.69±1.06 a | 8.15±3.84 a | 3.47±0.19 b |
| 29 | Methyl ellagic acid pentoside* | 9.83 | C20H16O12 | 0.47±0.49 a | 0.09±0.01 a | 0.08±0.01 a |
| 30 | Syringaldehyde | 10.75 | C9H10O4 | 6.78±0.23 a | 1.25±0.36 b | 1.50±0.17 b |
| **Total (mg/100gDW)** | | | | 19.94±1.70 a (41.99%) | 11.58±4.82 b (20.59%) | 6.88±0.40 b (22.37%) |
| **Total PC (mg/100gDW)** | | | | 47.49±2.66 a | 56.25±2.36 a | 30.77±5.10 b |

Values represent the mean ± standard error (n = 3). The different lowercase letters between each row indicate significant differences (p < 0.05) between the Chinese olive species. Quantification was reported in mg/100 g DW. ND = not detected. * Galloylquinic acid, gallic acid hexoside and brevifolincarboxylic acid were quantified in gallic acid equivalents. Nobiletin and amentoflavone were quantified in hyperoside equivalents. Dihydrokaempferol was quantified in kaempferol equivalents. Geraniin isomers, geraniin, ellagic acid pentoside, and methyl ellagic acid pentoside were quantified in ellagic acid equivalents.

**Table 4 of Supplementary material** Calibration curves used for UPLC-MS/MS quantification of phenolic compounds.

|  | **Phenolic compounds** | **Calibration curves** | **Correlation coefficients (r2)** | **Linear ranges (ng/mL)** |
| --- | --- | --- | --- | --- |
| 1 | Quinic acid | Y = 474066+37436.7*X | 0.9999 | 34.704-4993.240 |
| 2 | Gallic acid | Y = -511402+43335.8*X | 1.0000 | 12.121-5002.742 |
| 3 | Vanillic acid | Y = -144667+2949.35*X | 0.9993 | 88.094-5034.729 |
| 4 | Syringic acid | Y = -499429+6540*X | 0.9984 | 83.435-5028.414 |
| 5 | Protocatechuic acid | Y = 14594.8+32044.2*X | 0.9999 | 0.940-4999.407 |
| 6 | 4-Hydroxybenzoic acid | Y = 1555500+38341.5*X | 0.9990 | 13.365-4974.789 |
| 7 | Chlorogenic acid | Y = 221223+20077.3*X | 0.9996 | 31.167-4986.573 |
| 8 | Esculetin | Y = 10420200+100125*X | 0.9957 | 217.381-4947.619 |
| 9 | Caffeic acid | Y = 1055950+78625.2*X | 0.9998 | 37.295-4992.554 |
| 10 | 4-Hydroxycinnamic acid | Y = 1713660+71899.8*X | 0.9998 | 1.331-4991.344 |
| 11 | Ferulic acid | Y = 148895+26664*X | 1.0000 | 6.387-4998.020 |
| 12 | Isoferulic acid | Y = -61412.9+2946*X | 0.9997 | 23.991-5011.701 |
| 13 | Coumaric acid | Y = -57752.9+1416.35*X | 0.9998 | 70.077-5020.944 |
| 14 | Genistin | Y = 20947.4+3102.9*X | 1.0000 | 2.736-4996.989 |
| 15 | Genistein | Y = 13657100+170781*X | 0.9976 | 223.941-4961.438 |
| 16 | Hyperoside | Y = 546245+18544.5*X | 0.9996 | 23.182-4986.088 |
| 17 | Astragalin | Y = 1404690+31513.4*X | 0.9990 | 8.536-4977.245 |
| 18 | Isoquercitrin | Y = 768870+22520.7*X | 0.9993 | 17.932-4984.228 |
| 19 | Quercetin | Y = 6051820+55401.9*X | 0.9938 | 183.477-4936.325 |
| 20 | Kaempferol | Y = 10181600+104115*X | 0.9961 | 225.559-4950.054 |
| 21 | (-)-Gallocatechin | Y = -221452+19467.3*X | 0.9998 | 14.548-4997.684 |
| 22 | Procyanidin B1 | Y = -42719.6+6752.17*X | 1.0000 | 10.199-5000.002 |
| 23 | Catechin | Y = -252455+32115.4*X | 0.9999 | 14.309-5002.795 |
| 24 | Procyanidin B2 | Y = -244115+8836.59*X | 0.9999 | 31.771-5007.390 |
| 25 | Epicatechin | Y = 1115040+40844.7*X | 0.9996 | 23.416-4983.471 |
| 26 | Corilagin | Y = -6482770+10831.7*X | 0.9993 | 616.245-50134.213 |
| 27 | Paeonol | Y = 86602.9+1532.31*X | 0.9999 | 60.713-4997.408 |
| 28 | Ellagic acid | Y = -1512580+19868.7*X | 0.9982 | 78.744-5016.388 |
| 29 | Syringaldehyde | Y = -317083+6364.65*X | 0.9992 | 57.977-5020.643 |
